# Supplementary material for: The planarian TRPA1 homolog mediates extraocular behavioral responses to near ultraviolet light
Source: Oxford University Press journal article supplement (doi:10.1242/jeb.152298), 2017-01-01
Supplement: jeb152298supp.pdf [file jeb152298supp.pdf]

## Movies

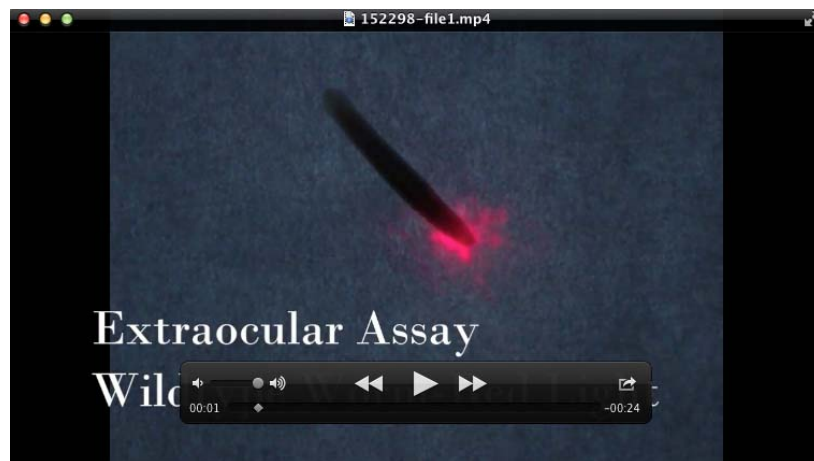

Movie 1. Extraocular Assay. Behavioral responses to laser light directed on the tail. Wildtype worms have no behavioral response to either red or green light. Ultraviolet (near UV) light on wildtype worms produces a significant tail thinning response, while Smed-TrpA RNAi results in a loss of the tail thinning response to near UV light.

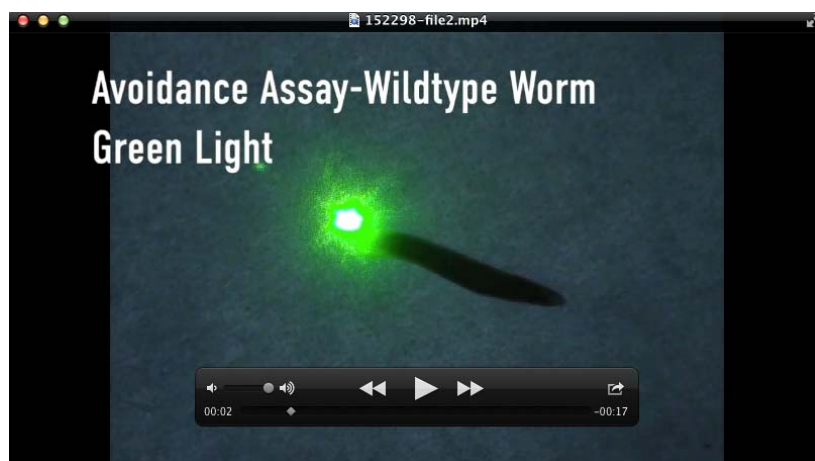

Movie 2. Avoidance Assay with green laser light. Behavioral responses to light in front of the animal's path. Wildtype worms have a moderate response to green light (where they turn to avoid traveling through the light), which is lost following either double eye ablation or *Smed-TrpA* RNAi.

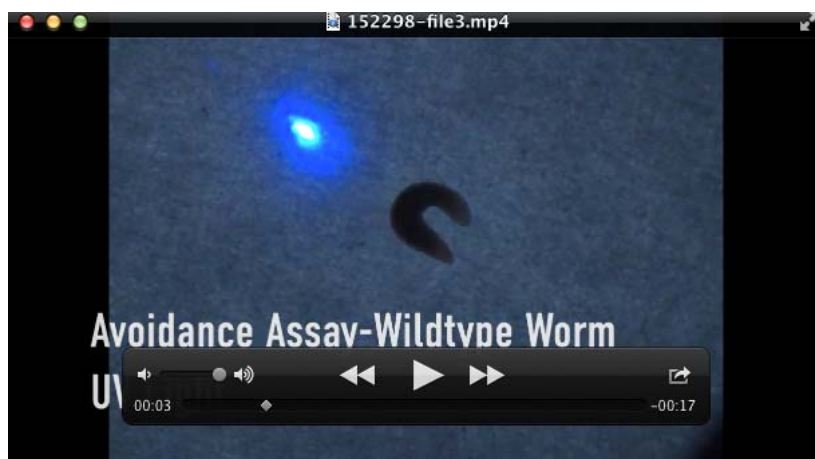

Movie 3. Avoidance Assay with near ultraviolet (UV) laser light. Behavioral responses to light in front of the animal's path. Both wildtype and double eye ablated worms have a severe response to near UV light (where they reverse direction away from the light), which is lost following *Smed-TrpA* RNAi.
